# Supplementary material for: Preparation and performance of novel enhanced electrochemical capacitors based on graphene constructed self-assembled Co3O4 microspheres
Source: Royal Society of Chemistry journal article supplement (doi:10.1039/c6ra15960e), 2016-01-01
Supplement: c6ra15960e1.pdf [file c6ra15960e1.pdf]

### Supporting information:

#### Preparation and Performance of Novel Enhanced Electrochemical Capacitors Based on Graphene Constructed Self-assembled $\text{Co}_3\text{O}_4$ Microspheres

Ningbo Yu,<sup>a</sup> Qi Huang,<sup>a</sup> Ning Fu,<sup>a</sup> Jifu Ren,<sup>a</sup> Deli Lu,<sup>a\*</sup> Sheng Han<sup>a\*</sup>

<sup>a</sup> School of Chemical and Environmental Engineering, Shanghai Institute of  
Technology, Shanghai, 201418, PR China

E-mail: ldl@sit.edu.cn (D. Lu); hansheng654321@sina.com (S. H.)

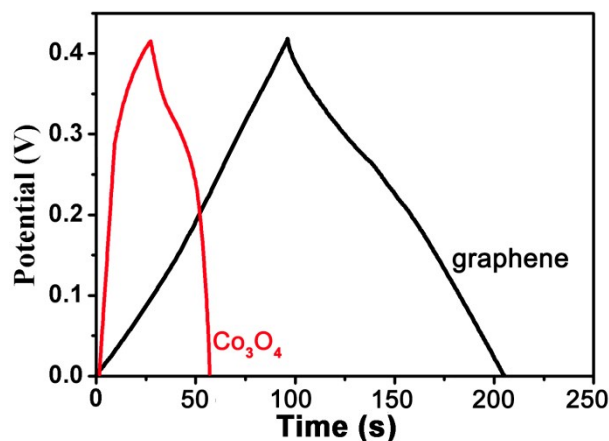

Fig. S1 galvanostatic charge-discharge curve of graphene and pure  $\text{Co}_3\text{O}_4$  at a current density of 0.5 A/g in 6 mol  $\text{L}^{-1}$  KOH solution.

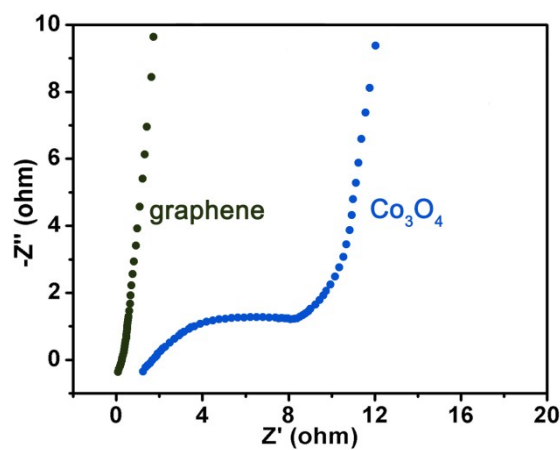

Fig. S2 Nyquist plots of pure  $\text{Co}_3\text{O}_4$  and graphene
